# Supplementary material for: The “Golden Points” and nonequilibrium correction of high-accuracy frost point hygrometers
Source: Copernicus journal article supplement (doi:10.5194/egusphere-2025-2003), 2025-06-04
Supplement: Supplementary file [file egusphere-2025-2003-AC2-supplement.pdf]

## Review of

### 'The "Golden Points" and nonequilibrium correction of high-accuracy frost point hygrometers' by Poltera et al.

## Author response to reviewer comments

*We would like to thank the two anonymous reviewers and Takuji Sugidachi for their constructive and critical evaluations. Some of their comments were challenging and required considerable effort, but they also helped to improve the quality and readability of our manuscript. The reviewers' comments are listed below in black font, and our responses are in italicized blue font. We would like to thank our reviewers once again, as well as the editor for allowing us additional time for revision.*

## RC1 - Referee#1 Comment

**'Comment on egusphere-2025-2003', Anonymous Referee #1, 01 Jul 2025**

**Citation:** <https://doi.org/10.5194/egusphere-2025-2003-RC1>

### Review report

The "Golden Points" and nonequilibrium correction of high-accuracy frost point hygrometers

By Yann Poltera, Beiping Luo, Frank G. Wienhold, and Thomas Peter

## Summary

This paper proposes a very active use of the mirror reflectance data ( $U_m$ ) of the balloon-borne Cryogenic Frostpoint Hygrometer (CFH) measurements to obtain much more information than previously done, resulting in less uncertainty and higher temporal/vertical resolution of the measured water vapor concentrations. The central ideas include the so-called Golden Points where the time derivative of  $U_m$  becomes zero, and moreover, the correction for the data points between these Golden Points, the latter of which is termed as nonequilibrium correction. The theoretical background and actual implementation procedures of this nonequilibrium correction are fully explained and discussed in Section 4; and, the theory with several key assumptions look very reasonable to me. Then, the correction is applied to a large number of (~70) CFH sounding data taken from various locations from the tropics, through Northern Hemisphere (NH) midlatitudes, to NH winter polar region, showing that the proposed method actually results in less uncertainty and higher temporal/vertical resolution of the CFH measurements. I believe that this paper manuscript would mark a very important step historically for balloon-borne chilled-mirror hygrometry.

*Thank you for this overall positive review.*

## **Comment #1 ‘text length’**

While the manuscript is very well written after Section 3, I was a little bit ‘uneasy’ while reading through Sections 1 and 2. This is mainly because there is no explanation on the Golden Points nor on the nonequilibrium correction until Section 3. Instead, there are rather lengthy (in-depth) reviews on atmospheric water vapor, observational challenges, etc. (I also notice that there is duplicated information in several places.) I am afraid that this style may even discourage some readers to read it through. I personally think that the authors can go more quickly to the definition of the Golden Points and to the explanation of the nonequilibrium correction in the manuscript. At least, at the end of Section 1, the authors should explain the definition of the Golden Points and the overview of the nonequilibrium correction and describe what will be discussed in each of the following sections. This will make the introductory part even longer, thus the authors may consider shortening the review part and removing duplicated information. (Please let me note that the review part itself is very interesting, but probably is less relevant to the main points of this manuscript.)

*Thank you for your careful judgement. After reading our original manuscript again, we have to agree with you and apologize for some extensive review material. We have shortened Sections 1 and 2 by 44 % and start the introduction with a historical link to the Golden Points. And at the end of Section 1, we now provide an overview of the paper so that we hopefully do not deter any readers.*

## **Specific comments and suggestions**

Please see below for specific comments and suggestions.

- Section 1: Please see the above comments for this section. (I do agree that this is a very good set of reviews on the matter, but perhaps less for this particular manuscript.)

*We have shortened Section 1 by about 46 %.*

- Section 2: I think that the authors can shorten this part as well, describing only the key technical aspects of CFH, RS41, and FLASH-B which are directly relevant to the discussion in and after Section 3. (The main topic of this paper manuscript is the application of Golden Points concept and nonequilibrium correction.)

*We have shortened Section 2 by about 40 %. Technical details CFH, RS41, and FLASH-B have been moved to the Appendix.*

- Paragraph at lines 171-177: SKYDEW may also be mentioned already here.

*We have added SKYDEW and corresponding reference (Sugidachi et al., 2025).*

- Line 213: Could you add a few more words to explain what does “auto-correlated error component” mean?

*We have added a few more words of explanation*

- Line 353: “resp.” should be “or” (there are few other places where “resp.” appears)

*We have changed this accordingly*

- Line 387: Sugidachi et al., 2025 is also a good example.

*We have added Sugidachi et al., 2025.*

- Line 434: “less than 0.2 K error” – please add an explanation why (although this may have already been explained implicitly somewhere).

*We reformulated the text and write now: “CFH has been shown to measure the frost point with less than 0.2 K error under equilibrium conditions in the laboratory (Fahey et al., 2014) and under good flight conditions (Vömel et al., 2016), which we assume to also apply also to the equilibrium situation of the Golden Points (see further Section 5.5 for a discussion of the uncertainty at the Golden Points).”*

Also, add “vapour” to water mixing ratio.

*We have added “vapor” (American english)*

- Paragraph starting from line 438: The technical information on FLASH-B may be moved to Section 2, so that we can concentrate on the Golden Points concept itself here.

*We have moved the technical information on FLASH-B to the Appendix*

- Paragraph starting from line 466: The technical information on RS41 may be moved to Section 2, so that we can concentrate on the Golden Points concept itself here.

*We have moved the technical information on RS41 to the Appendix.*

Also, for RS41 data provided from the ground-receiving system, a time-lag correction may have already been applied within the manufacturer software. Does the sentence mean that the authors make an additional time-lag correction? In other words, do you mean that the manufacturer’s time-lag correction is insufficient? Please clarify this in the text.

*No, we apply our own time-lag correction from the raw humidity of the heated humidity sensor and humidity sensor temperature data in the Vaisala sounding files (raw humidity of the heated humidity sensor and humidity sensor temperature). We have now clarified this in Section 3.2. by referring to the Vaisala data (raw RH and T).*

- Line 520: Please add one sentence to justify this simplification.

*We have added the  $Re = \rho_{air} / \mu_{air} * V / L$  equation, stating that  $\mu_{air} \approx 1.7 \times 10^{-5} \text{ m}^2 \text{ s}^{-1}$  from the ground to the middle stratosphere and that  $L = 3.5 \text{ mm}$  (Section 4.1.2.).*

- Lines 563-573: This part is related to the Golden Points. I think that this may be moved to Section 3.1, so that we can concentrate on the nonequilibrium equation here.

*That is indeed related to the Golden Points, but we believe it fits best here as the paragraph before describes different cases of  $dUm/dt$ ,*

- Line 587: The term “standard diffusion coefficient” should appear here, not at line 590.

*We have changed this accordingly.*

- Section 4.2 (corrections to RS41 data) and Section 4.3 (corrections to FLASH-B data) may be moved to Section 2 or to Appendix/Supplement, because this manuscript mainly discusses the CFH data corrections (and the readers would be primarily interested in those, and probably not the details of the RS41 and FLASH-B corrections although they are important). Having rather long subsections here may disturb the logical flow.

*We have moved the description of the correction methodologies for RS41 and FLASH-B to the Appendix.*

- Lines 942-944: This last sentence, starting from “However” is not clear to me in terms of the logical relationship with the previous sentences. What is the point?

*Agreed. We have removed this and the previous sentence as it may confuse readers.*

- Lines 1004-1005. I am confused here. Is 10% RH “high”? Probably, additional explanation is needed why this number can be regarded as high.

*We have improved the text, now saying that RH is sufficiently high for the RS41 sensor.*

- Lines 1046-1047: “Thus, it is unclear whether PID control is the most appropriate approach to frost control of chilled mirror hygrometers.”: Do you mean that there could be other, more sophisticated and/or appropriate control methods for upper-air chilled mirror hygrometry? Please add a few more words to explain this.

*Yes, we have a ‘Golden Points’ seeking algorithm in mind that does not rely on PID but we have not tested it yet. We have added this in the text (right before Section 5.5).*

- Section 5.5.1, in particular, the part “High humidity and low number density of aerosol particles point to the polar vortex as a possible region of origin.”: Just out of curiosity, I looked at a reanalysis data set MERRA-2 (<https://gmao.gsfc.nasa.gov/reanalysis/MERRA-2/docs/>) whether this could be a case. NASA/GMAO has a website, <https://fluid.nccs.nasa.gov/reanalysis/>, where we can quickly see weather charts, for example, of potential vorticity at 50 hPa over the Arctic region: [https://fluid.nccs.nasa.gov/reanalysis/classic\\_merra2/?stream=MERRA2&field=epv&level=50&fcst=20180419&region=nps&tau=00&track=none](https://fluid.nccs.nasa.gov/reanalysis/classic_merra2/?stream=MERRA2&field=epv&level=50&fcst=20180419&region=nps&tau=00&track=none)

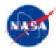

Modern-Era Retrospective Analysis for Research and Applications, Version 2 (MERRA-2)  
50 hPa Abs Potential Vorticity [PVU], Heights [dam]

GMAO

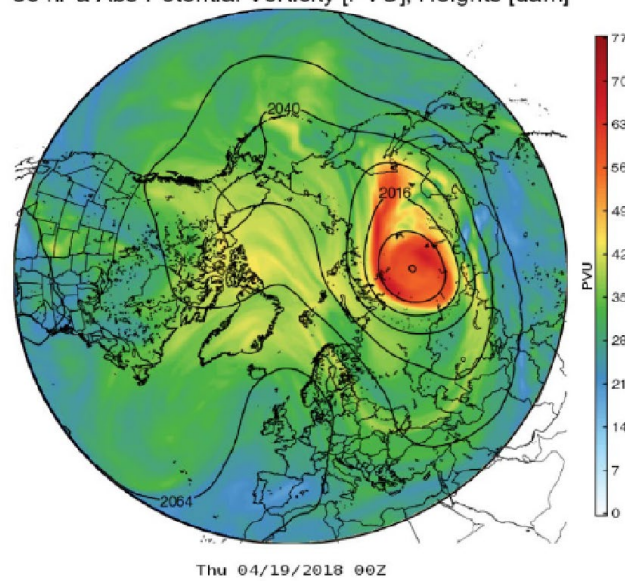

The above figure shows that air mass with relatively high PV values (maybe in the form of differential advection) was actually coming to the western Europe region. The maximum PV stream (colored in yellow) over Europe is located somewhat to the east, but this may be related to difference in time (00 UTC for this figure), actual balloon trajectory, the choice of 50 hPa, etc. More investigation would be needed by downloading and analyzing full model-level reanalysis data (e.g., MERRA-2, ERA5, etc.) to investigate whether the hypothesis is true, although I am not suggesting to do so for this paper manuscript.

*We thank the reviewer for this analysis of the MERRA-2 reanalysis data set. We have performed a similar analysis, but decided not to include it in the paper.*

- Line 1185: "0.4 s" – perhaps add "for this particular case"

*We have added this*
